# Supplementary material
Source: Springer Nature journal article supplement (https://www.springermedizin.de/resource/supplementary/12889_2013_5961_MOESM2_ESM.pdf/9493988)

## SMS Response Profile by Week

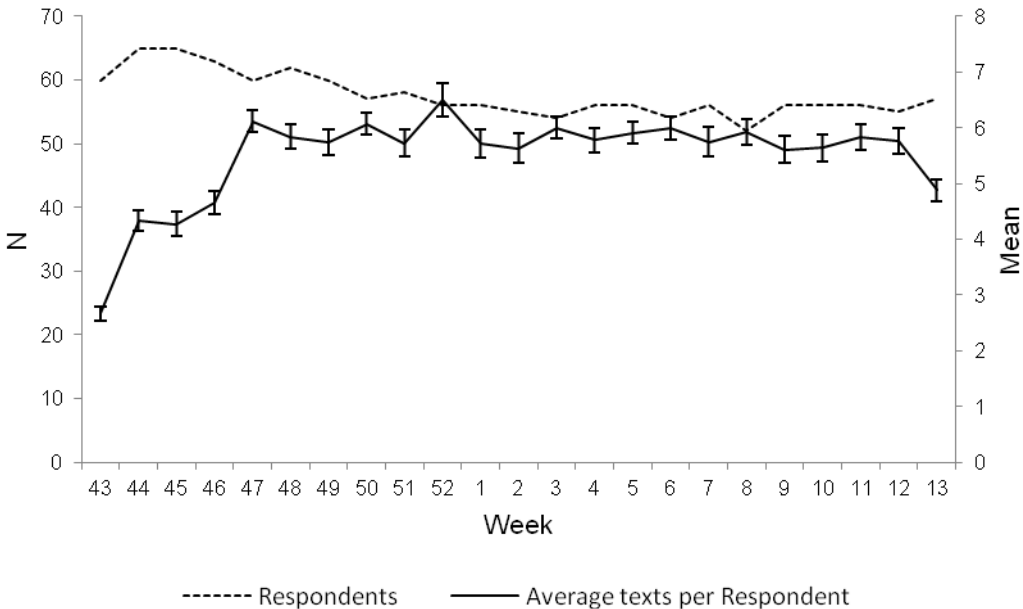

Supplement: MOESM2 [file 9493988]
